# Supplementary figures and images for: Programming layer-by-layer liquid phase epitaxy in microfluidics for realizing two-dimensional metal–organic framework sensor arrays
Source: Royal Society of Chemistry journal article supplement (doi:10.1039/d4en00764f), 2025-01-01

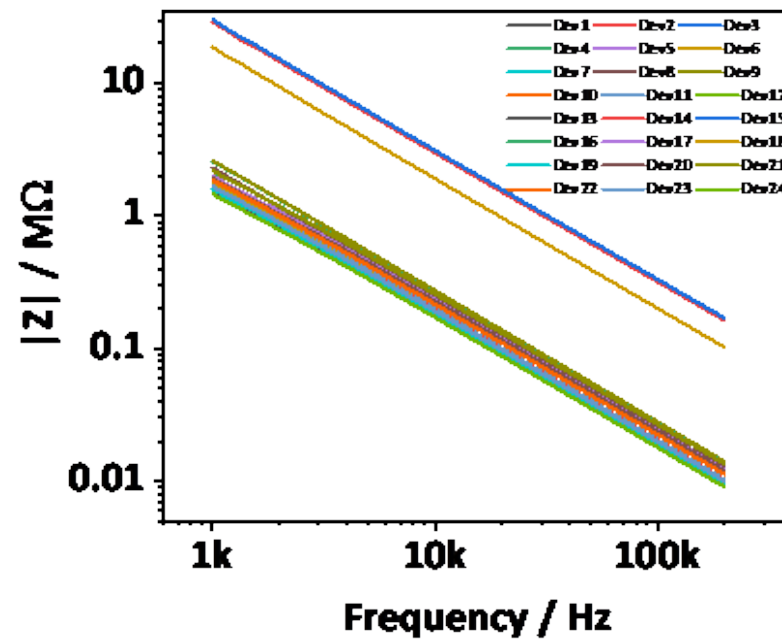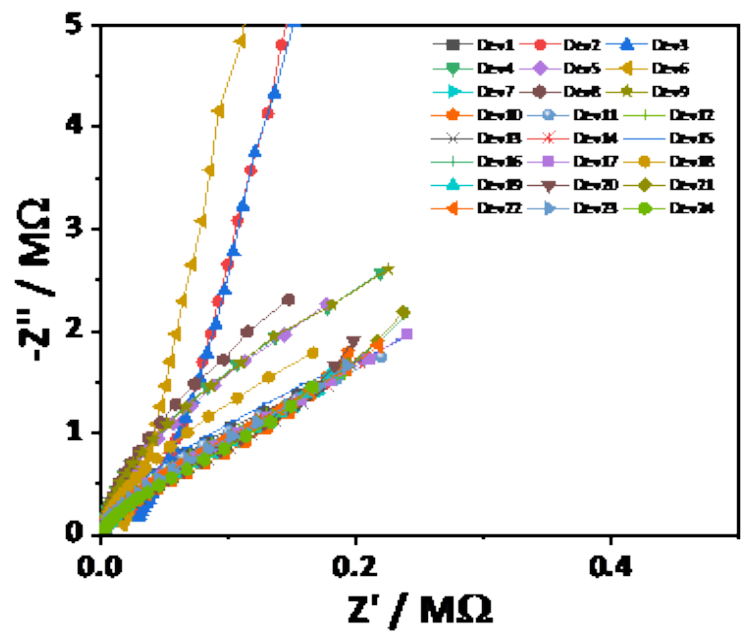

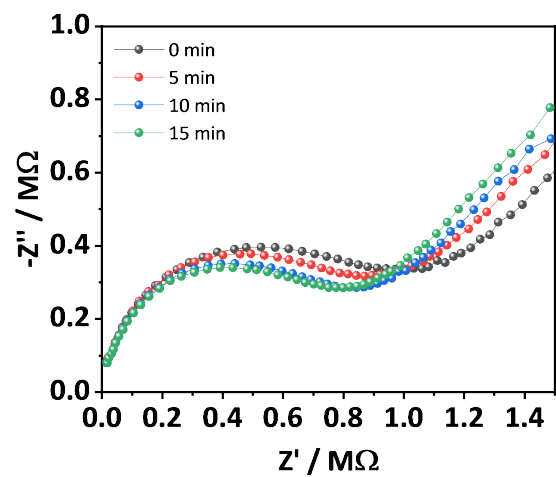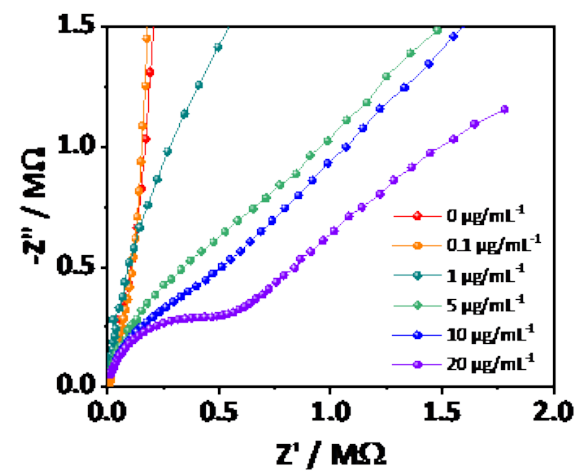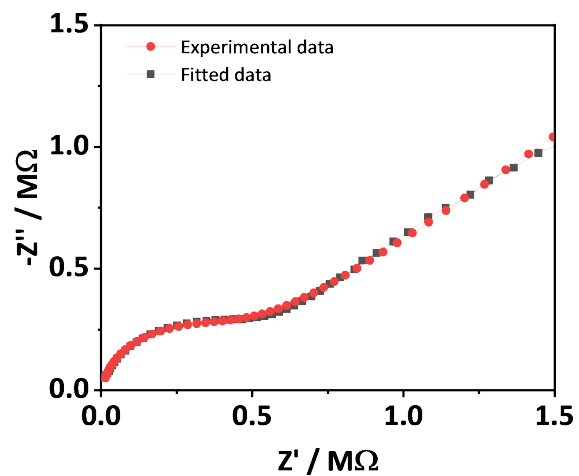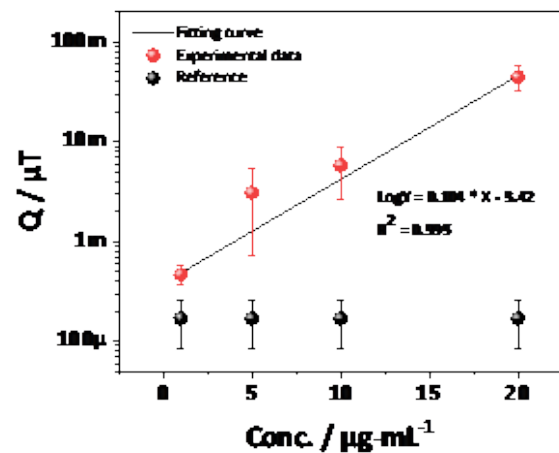

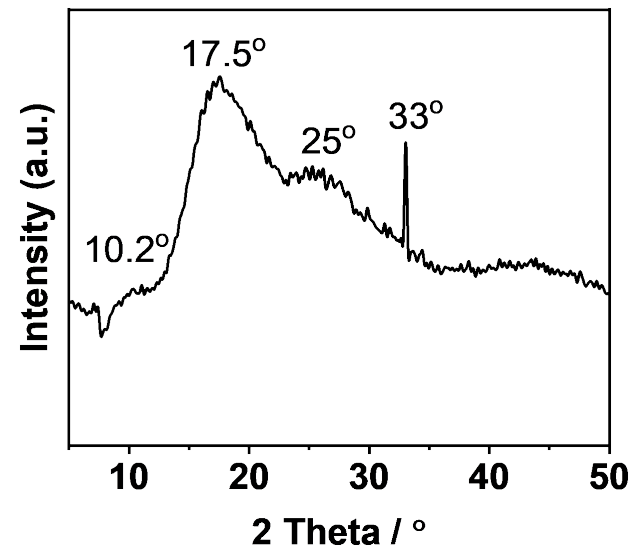

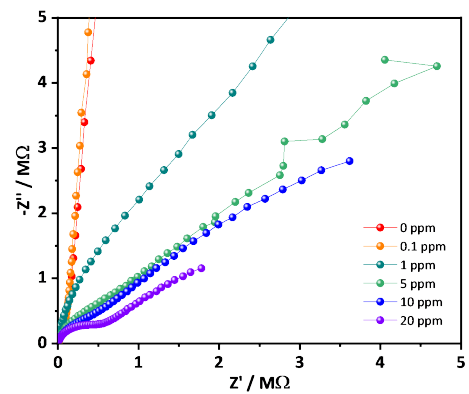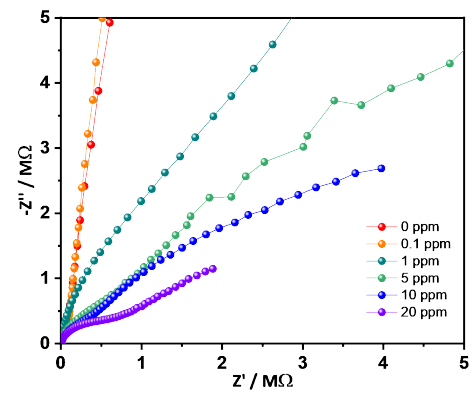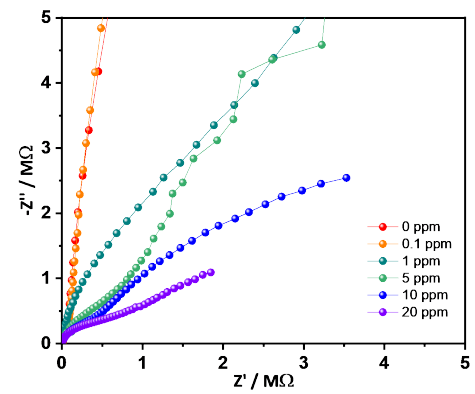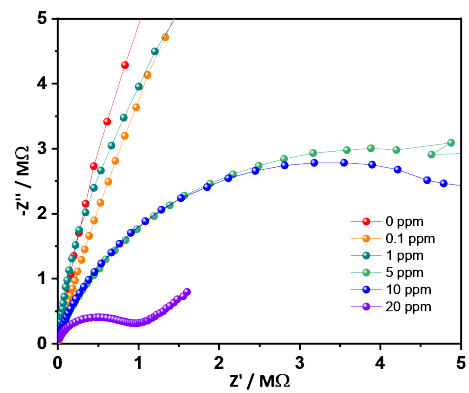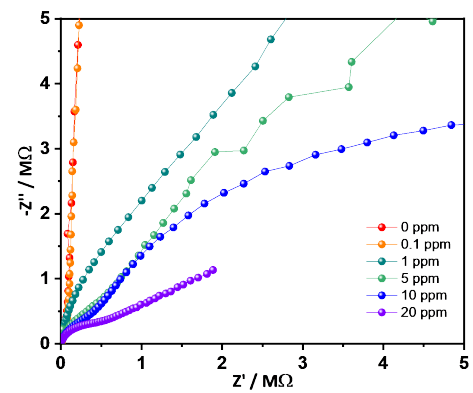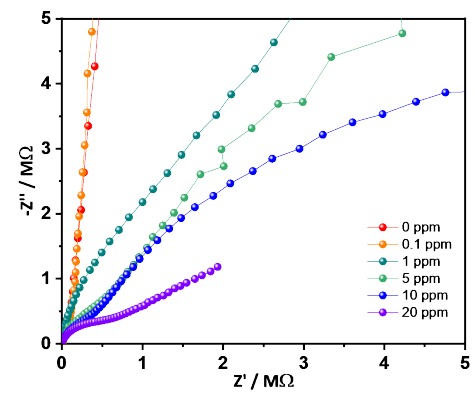

Supplement: d4en00764f1.pdf [file d4en00764f1.pdf]
